# Supplementary material for: 2D vanadium doped manganese dioxides nanosheets for pseudocapacitive energy storage
Source: Royal Society of Chemistry journal article supplement (doi:10.1039/c5nr04682c), 2015-01-01
Supplement: c5nr04682c1.pdf [file c5nr04682c1.pdf]

## Supporting Information

### 2D Vanadium Doped Manganese Dioxides Nanosheets for Pseudocapacitive Energy Storage

Zhimi Hu<sup>‡ a</sup>, Xu Xiao<sup>‡ a</sup>, Liang Huang<sup>‡ a</sup>, Chi Chen<sup>b</sup>, Tianqi Li<sup>a</sup>, Tiecheng Su<sup>a</sup>, Xiaofeng Cheng<sup>a</sup>, Ling Miao<sup>b</sup>, Yanrong Zhang<sup>c</sup> and Jun Zhou<sup>a \*</sup>

Z. M. Hu, X. Xiao, Dr. L. Huang, T. Q. Li, T. C. Su, X. F. Cheng, and Prof. J. Zhou  
Wuhan National Laboratory for Optoelectronics, and School of Optical and Electronic  
Information, Huazhong University of Science and Technology, Wuhan, 430074, China

C. Chen, Dr. L. Miao,

School of Optical and Electronic Information, Huazhong University of Science and  
Technology, Wuhan 430074

Prof. Y. R. Zhang

Environmental Science Research Institute, Huazhong University of Science and  
Technology, Wuhan 430074 (China)

\*Corresponding author

E-mail: [jun.zhou@mail.hust.edu.cn](mailto:jun.zhou@mail.hust.edu.cn)

<sup>‡</sup> Authors with equal contribution

- 1. Morphology structure and electrochemical characterization on  $\beta$ -MnO<sub>2</sub> (sample MO)**
- 2. Morphology structure of sample 0.125 VMO and 0.25 VMO**
- 3. More characterizations on the V doped MnO<sub>2</sub> nanosheets**
- 4. More electrochemical characterizations on the device**
- 5. Details in the first principle calculations**

# 1. Morphology structure and electrochemical characterizations on $\beta$ -MnO<sub>2</sub> (sample MO)

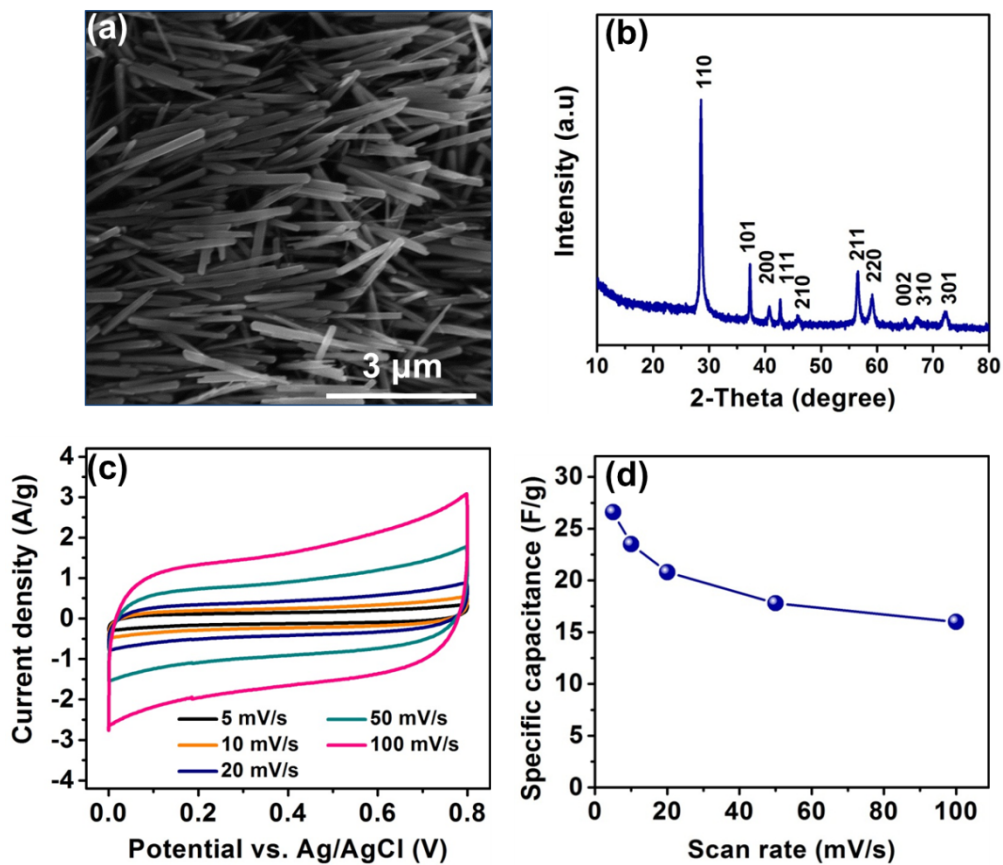

**Fig. S1** (a) SEM image of  $\beta$ -MnO<sub>2</sub> (sample MO). (b) XRD pattern of  $\beta$ -MnO<sub>2</sub>. (c) CV curves of  $\beta$ -MnO<sub>2</sub> at scan rate increase from 5 mV/s to 100 mV/s by a typical three-electrode configuration. (d) Gravimetric capacitance as a function of current density for  $\beta$ -MnO<sub>2</sub>.

## 2. Morphology structure of sample 0.125 VMO and 0.25 VMO

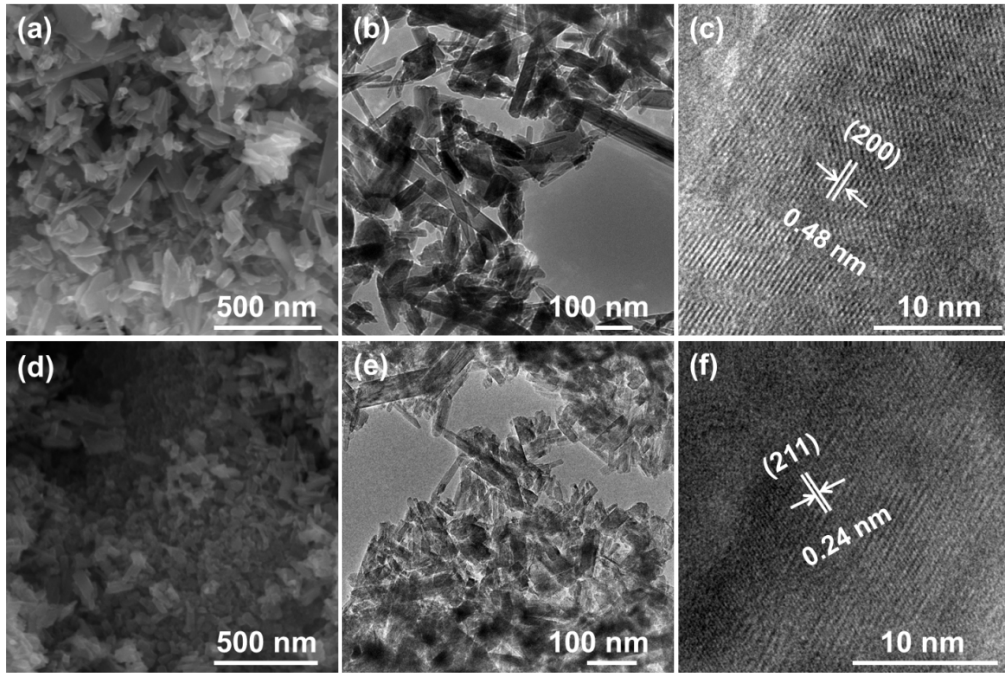

**Fig. S2** (a) SEM image of sample 0.125 VMO. (b), (c) TEM and HRTEM images of sample 0.125 VMO. (d) SEM image of sample 0.25 VMO. (e), (f) TEM and HRTEM images of sample 0.25 VMO.

### 3. More characterizations on the V doped MnO<sub>2</sub> nanosheets

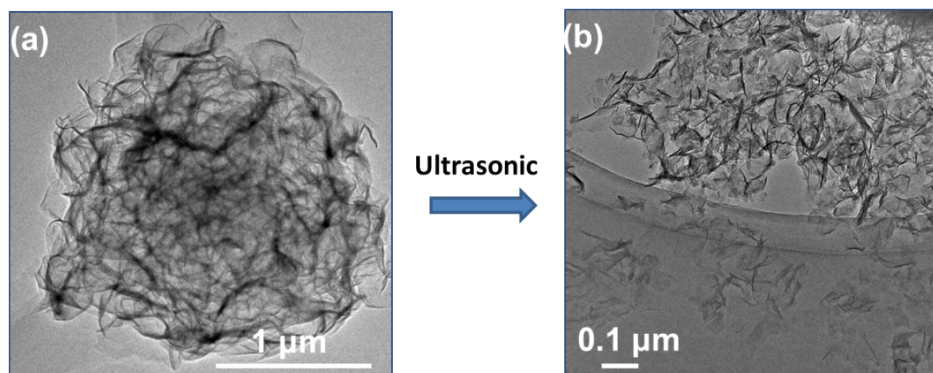

**Fig. S3** (a) TEM image of sample 0.5 VMO before ultrasonic. (b) TEM image of sample 0.5 VMO after ultrasonic in ethanol and H<sub>2</sub>O mixture solution (v:v=3:7).

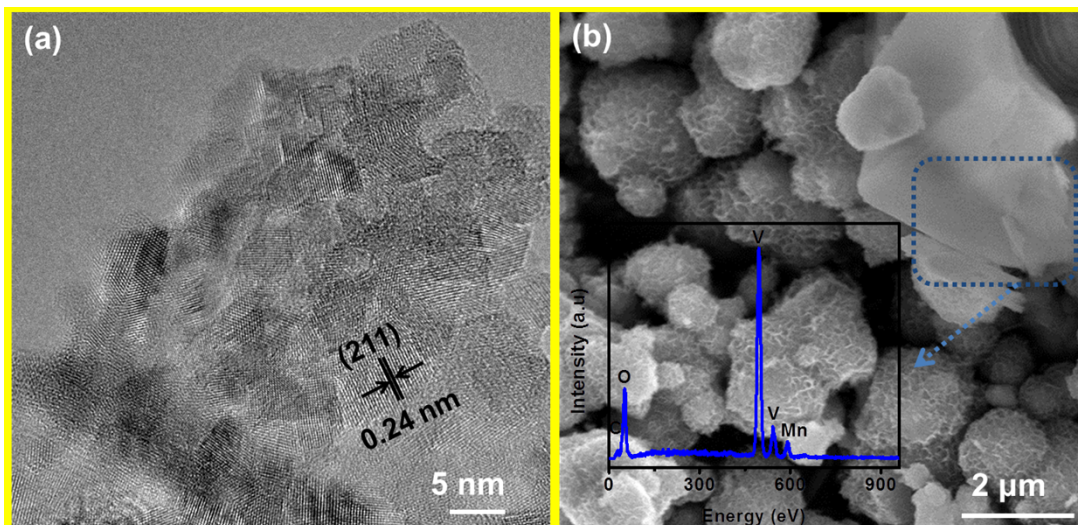

**Fig. S4** (a) HRTEM image of sample 0.5 VMO. (b) SEM image of sample with a V dopant amount at 1mmol in the reaction solution, the insert shows the EDX.

Table S1: The content of element V with different test methods

| Sample    | Content of element V with different test methods |         |         |
|-----------|--------------------------------------------------|---------|---------|
|           | EDS                                              | ICP-OES | XPS     |
| 0.125 VMO | 1.3 (%)                                          | 1.5 (%) | 1.5 (%) |
| 0.25 VMO  | 2.9 (%)                                          | 2.3 (%) | 2.4 (%) |
| 0.5 VMO   | 5.1 (%)                                          | 5.6 (%) | 4.8 (%) |

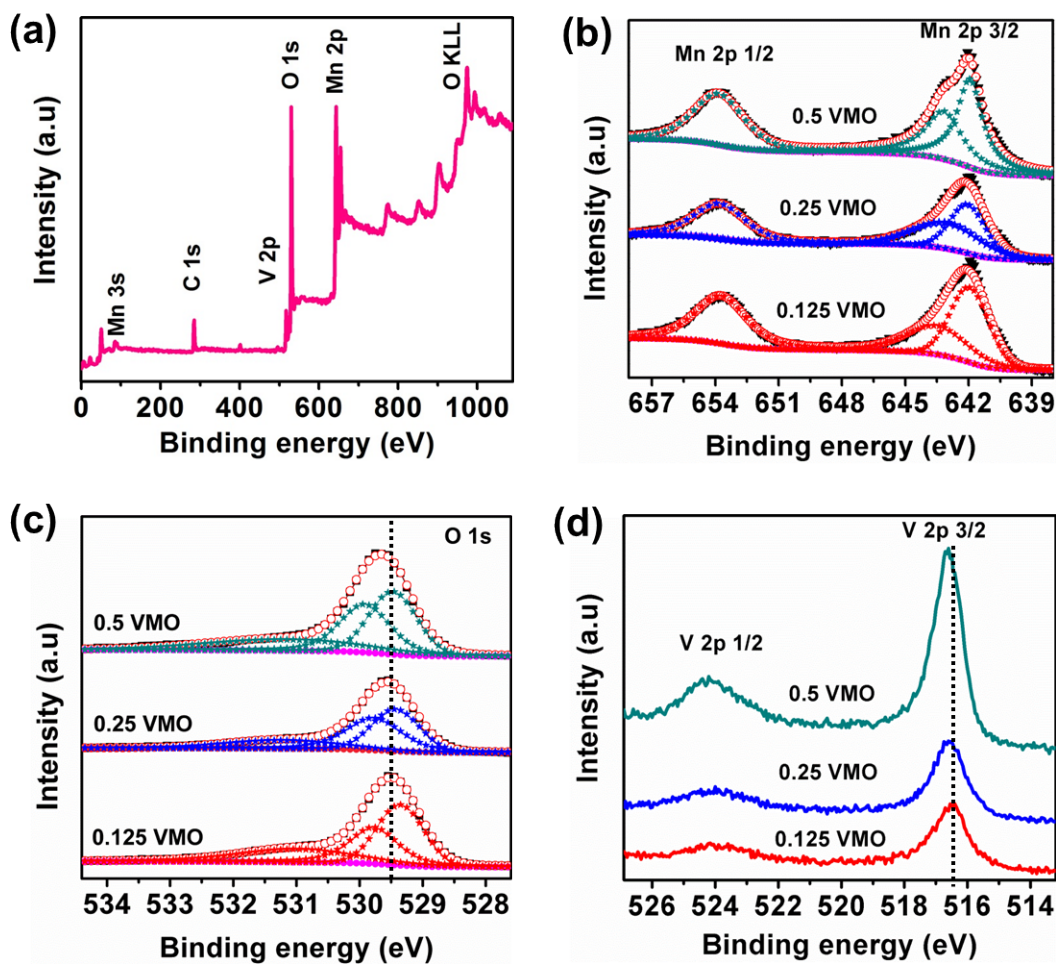

**Fig. S5** (a) XPS survey spectra of sample 0.5 VMO. High-resolution XPS spectra for (b) Mn 2p, (c) O 1s, (d) V 2p of sample 0.5 VMO, 0.25 VMO, 0.125 VMO.

Table S2: Surface characteristics as derived from Nitrogen gas adsorption data

| Sample    | SSA (m <sup>2</sup> /g) | Pore volume(cm <sup>3</sup> /g) | Pore width (nm) |
|-----------|-------------------------|---------------------------------|-----------------|
| 0.125 VMO | 92                      | 0.368                           | 15.9            |
| 0.25 VMO  | 151                     | 0.479                           | 12.6            |
| 0.5 VMO   | 273                     | 0.670                           | 9.0             |

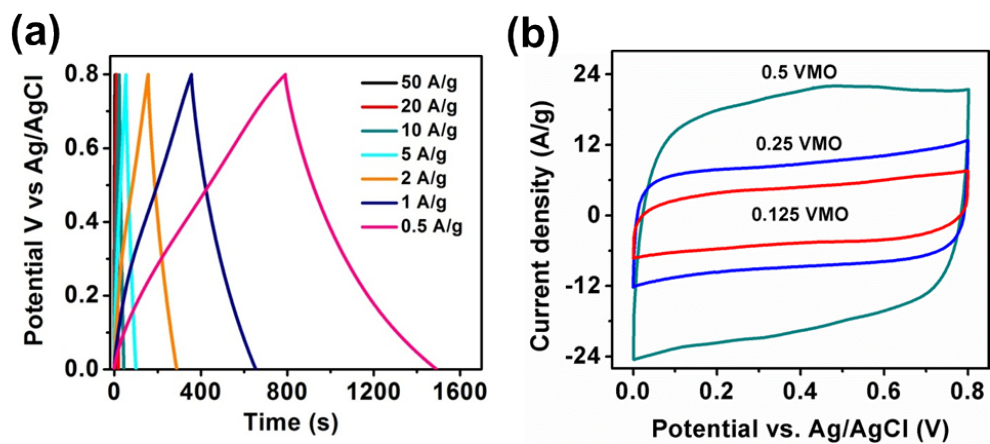

**Fig. S6** (a) Galvanostatic charge/discharge curves of sample 0.5 VMO electrode with current density from 0.5 A/g to 50 A/g. (b) CV curves of sample 0.5 VMO, 0.25 VMO, 0.125 VMO at scan rate of 50 mV/s.

#### 4. More electrochemical characterizations on the device

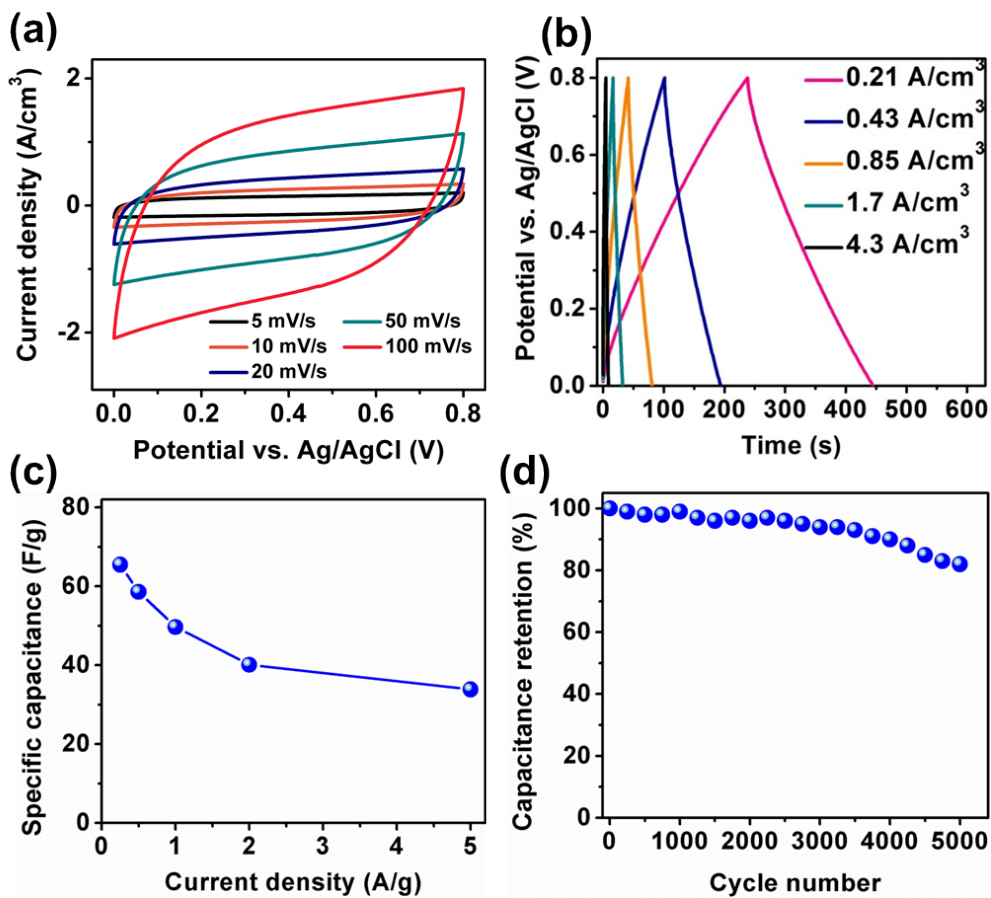

**Fig. S7** (a) CV curves of the device. (b) Galvanostatic charge/discharge curves of the device. (c) Gravimetric capacitance as a function of current density for the device. (d) Cycling performance of the device.

## 5. Details in the first principle calculations

Our first-principle calculations are performed using VASP code <sup>[1]</sup> based on density-functional theory (DFT). <sup>[2-3]</sup>The exchange-correlation energy is described by the functional of Perdew-Burke-Ernzerhof (PBE) based on general gradient approximation (GGA) <sup>[4]</sup> with Hubbard U corrections (GGA+U). And in our calculations we employed GGA+U approach with  $U-J = 3.9$ . A plane wave cutoff of 400 eV is used. The structural relaxation is performed until the forces on all the atoms are less than 0.03 eV/Å. The brillouin zone is sampled with  $2 \times 2 \times 1$  Monkhorst mesh <sup>[5]</sup> in structure relaxation,  $4 \times 4 \times 1$  Monkhorst mesh in energy computations and  $8 \times 8 \times 1$  Monkhorst mesh in density of states (DOS) computations. And spin polarization is considered in the calculations.

### References

- [1] G. Kresse, J. Hafner, *Phys. Rev. B* 1994, **49**, 14251-14269.
- [2] P. Hohenberg, W. Kohn, *Phys. Rev. B* 1964, **36**, B864-B871.
- [3] W. L. Kohn, J. Sham, *Phys. Rev.* 1965, **140**, A1133-A1138.
- [4] J. P. Perdew, K. Burke, M. Ernzerhof, *Phys. Rev. Lett.* 1996, **77**, 3865-3868.
- [5] H. J. Monkhorst, J. D. Pack, *Phys. Rev.* 1976, **13**, 5188-5192.
